# Supplementary material
Source: PubMed Central journal article supplement (PMC3478633)
Supplement: 1212797109_pnas.201212797SI.pdf [file 1212797109_pnas.201212797SI.pdf]

# Supporting Information

Tan et al. 10.1073/pnas.1212797109

## SI Materials and Methods

**Reagents and Growth Conditions.** Tryptone and yeast extract were purchased from Difco. Liquid LB media was made with 10 g of tryptone, 5 g of yeast extract, and 10 g of NaCl per L (high-salt LB Miller medium) (1) and was the normal media for growth in all experiments not using [<sup>32</sup>P]PO<sub>4</sub>. Solid LB media consisted of the liquid broth with 20 g of agar per L. Unless otherwise indicated, growth media contained only 5 g/L of NaCl (low salt LB Lennox medium; Becton, Dickinson and Co.) in experiments using [<sup>32</sup>P]PO<sub>4</sub>. Antibiotics were added whenever necessary at concentrations of 50 μg/mL for kanamycin and 100 μg/mL for ampicillin. Strains were grown at 30°C or 37°C, and cell density was measured as absorption at 600 nm (A<sub>600</sub>) by a DU spectrophotometer (Beckman Coulter). The pBAD30-derived (2) plasmids were grown with 0.2% L-(+)-arabinose unless indicated otherwise. Reagent grade chloroform, methanol, hydrochloric acid, sulfuric acid, isopropyl alcohol, and ethanol were purchased from Sigma. Synthetic phosphatidylglycerol (PG), phosphatidic acid (PA), phosphatidylethanolamine (PE), and CDP-diacylglycerol (CDP-DAG) were obtained from Avanti Polar Lipids, Inc.

**Bacterial Strain, Plasmids, and Molecular Biology Techniques.** *Escherichia coli* W3110 is designated as the wild type (WT) with respect to its glycerophospholipid composition. All strains and plasmids with their corresponding genotypes are listed in Table S1.

Genetic material was amplified by polymerase chain reaction (PCR) with KOD Hot Start DNA Polymerase (Novagen) following the manufacturer's protocols. Primers were synthesized by Integrated DNA Technology. Colony PCR was used to screen for appropriate colonies, and then the PCR products were sequenced at the DNA Analysis Facility of Duke University Health System. Plasmid transformations were accomplished using electroporation (3) or chemical transformation (4). All genomic gene deletions and plasmid constructs were verified by PCR and DNA sequencing.

**Construction of Chromosomal Mutants Lacking *cls* Genes.** Mutants containing deletions of the *cls* genes were constructed using the Keio collection (5) of mutants (Table S1). In place of the gene of interest, Keio mutants harbor a kanamycin cassette flanked by two FLP recombinase sites, allowing for the excision of the cassette. P1<sub>vir</sub> transduction was used to transfer these cassettes from the mutants to other strains (1). Multiple nonadjacent deletions were accomplished by excision of the initial kanamycin cassette. Kanamycin cassette incision used the plasmid pCP20 (6), which contains an FLP recombinase. This recombinase mediates the recombination of the two flanking FLP sequences ejecting the kanamycin sequence leaving only a FLP scar sequence. Transformants for pCP20 were selected for ampicillin resistance at 30°C. Colonies were purified twice at 42°C without antibiotics to cure the pCP20 plasmid. Strains were replica plated on plates without antibiotics and plates with ampicillin or kanamycin. Colonies that did not grow on plates with antibiotics were verified as deletions using PCR and DNA sequencing. The derived strains were subjected to another round of P1<sub>vir</sub> transduction and elimination of the kanamycin marker to introduce additional null mutations. In the case of adjacent genes, PCR was used to synthesize a double-stranded DNA with a kanamycin cassette flanked by FLP regions, which are further flanked by 50 base pairs of the upstream and downstream regions of genes to be deleted. These linear DNA strands were transformed into strain DY330, which contains the λ red recombinase for efficient recombination (7). Once

the deletions were confirmed in DY330, P1 transduction was used to move these deletions into the appropriate strains.

Strain BKT29 was derived from the strain of UE54 ( $\Delta$ *pgsA*) in which *PgsA* (Fig. 1) is not expressed and additional mutations in *lpp* and *rcsF* are required for cell viability (8). UE54's kanamycin cassette was excised using the FLP recombinase found in pCP20. This yielded the strain BKT25 (MG1655 *lpp2*  $\Delta$ *ara714* *rcsF*::mini-Tn10::Cam<sup>R</sup>  $\Delta$ *pgsA*), which was subjected to successive P1 transductions.

**Construction of Plasmids Containing *cls* Genes.** Regions from W3110 containing *clsA*, *clsB*, *clsC1*, *clsC2*, or *ymdB* were amplified using PCR. These PCR products were digested with XbaI, SphI, or HindIII restriction enzymes where appropriate and ligated into similarly digested pBAD30 vectors using T4 DNA ligase following the manufacturer's protocols. These products were transferred into DH5 $\alpha$  competent cells by means of chemical transformation. The transformants were grown overnight at 37°C on LB plates with ampicillin as the selection antibiotic. Colonies were purified twice on ampicillin plates. The placement of each gene under *araBAD* promoter regulation was verified by PCR and DNA sequencing.

Each of the two His residues in the two putative catalytic HKD motifs (Fig. S1) of *ClsC* were mutated to Ala. Plasmid pBAD-YC (carrying *ymdB-clsC*) was subjected to PCR mutagenesis to generate plasmids pBAD-YC H130A or pBAD-YC H369A.

**Complementation of the Triple *cls* Mutant.** Strain BKT12 ( $\Delta$ *clsABC*) transformed with plasmid pBAD30, pBAD-A, pBAD-B, pBAD-C, or pBAD-YC was grown overnight and diluted to an A<sub>600</sub> of 0.03 in LB media with 0.2% arabinose to induce *cls* gene expression. The strains were grown for 2 h to an A<sub>600</sub> of ~0.5 for logarithmic growth phase cells or for 6 h to an A<sub>600</sub> of ~2.0 for stationary phase cells. Cells were collected by centrifugation at 3,500  $\times$  g at 4°C and then washed with phosphate-buffered saline.

**Lipid Extraction and TLC Analysis.** Lipid extraction was accomplished through an acidic Bligh Dyer method (9). Each sample pellet from 100 mL of culture was brought up in 2 mL of 0.1 N HCl. Then 5 mL of methanol and 2.5 mL of chloroform were added to the aqueous solution to create a single-phase solution consisting of chloroform/methanol/0.1 N HCl [1:2:0.8 (vol/vol)]. This solution was incubated for 30 min at room temperature with intermittent mixing. Afterward, 2.5 mL of 0.1 N HCl and 2.5 mL of chloroform were added to convert the single phase to a two-phase solution consisting of chloroform/methanol/0.1 N HCl [2:2:1.8 (vol/vol)]. After centrifugation at 3000  $\times$  g for 25 min at room temperature, the lower phase was recovered and dried under a stream of nitrogen.

The dried lipid extract was resuspended in 100 μL of chloroform/methanol (2:1, vol/vol) and subjected to sonication for 1 min. Approximately 1–5 μL of sample was subjected to TLC using a TLC or HPTLC 60 plate (EMD) developed with solvent 4 (consisting of chloroform/methanol/acetic acid [65:25:5 (vol/vol)]). After drying the plate, lipids were visualized by spraying with 10% sulfuric acid in ethanol (vol/vol) followed by charring on a hot plate.

To determine the steady-state phospholipid composition by radiolabeling, cells were uniformly labeled with 5 μCi/mL of [<sup>32</sup>P]PO<sub>4</sub> either during overnight growth and after dilution to A<sub>600</sub> of 0.05 to initiate logarithmic growth or only after dilution of the overnight culture. Cells were harvested by centrifugation, and phospholipids were extracted as described above and analyzed after separation either by one-dimensional TLC on boric

acid-impregnated silica gel plates in solvent 1 (chloroform/methanol/water/ammonium hydroxide [60:37.5:3:1 (vol/vol)]) (10) or 2D TLC using solvent 2 (chloroform/methanol/ammonium hydroxide [130:60:8 (vol/vol)]) in the first dimension and solvent 3 (chloroform/methanol/acetic acid/water [170:25:25:6, (vol/vol)]) in the second dimension. Aqueous ammonia of 28–30% was used to make up solvents 1 and 2. Merck Kiesel gel 60 (0.25 mm) 20 × 20 cm TLC plates were used for 2D TLC. For one-dimensional TLC, 20 × 20 cm high-performance Partisil LK5 silica gel–precoated TLC plates with a concentration-zone (Whatman) were impregnated for 1 min in 1.2% boric acid in ethanol-water (1:1) as previously described (10). Radiolabeled lipids were visualized and quantified using a Personal Molecular Imager FX (Bio-Rad Laboratories). Stored images were processed and quantified using Quantity One software for scanning and analysis of the captured Phosphor images (Bio-Rad Laboratories). Phospholipid content is expressed as mol% of total phospholipid (correcting for two phosphates per molecule of CL) based on the intensity of the captured signal on Phosphor screen generated by the radiolabeled spots on the TLC plate. Values for quantified radiolabeled spots were rounded to two significant figures so totals are  $100 \pm 1\%$ . Because many of the minor radiolabeled spots are unknown, they were not included in the quantification of phospholipid composition. The results presented are representative of two or more determinations.

**Liquid Chromatography–Tandem Mass Spectrometry Analysis of *E. coli* Lipids.** Normal phase liquid chromatography (LC) was performed on an Agilent 1200 Quaternary LC system equipped with an Ascentis Silica HPLC column, 5  $\mu\text{m}$ , 25 cm × 2.1 mm (Sigma-Aldrich). Mobile phase A consisted of chloroform/methanol/aqueous ammonium hydroxide [800:195:5 (vol/vol)]; mobile phase B consisted of chloroform/methanol/water/aqueous ammonium hydroxide [600:340:50:5 (vol/vol)]; and mobile phase C consisted of chloroform/methanol/water/aqueous ammonium hydroxide [450:450:95:5 (vol/vol)]. The elution program consisted of the following: 100% mobile phase A was held isocratically for 2 min and then linearly increased to 100% mobile phase B over 14 min and held at 100% B for 11 min. The LC gradient was then changed to 100% mobile phase C over 3 min and held at 100% C for 3 min and finally returned to 100% A over 0.5 min and held at 100% A for 5 min. The total LC flow rate was 300  $\mu\text{L}/\text{min}$ . To achieve optimum ESI efficiency, a postcolumn splitter was used to divert ~10% of the LC effluent into the mass spectrometer, a QSTAR XL quadrupole time-of-flight tandem mass spectrometer (MS/MS) (Applied Biosystems). Instrumental settings for negative ion ESI and MS/MS analysis of lipid species were

as follows: ion spray voltage (IS) = –4500 V, curtain gas (CUR) = 20 psi, ion source gas 1 (GS1) = 20 psi, declustering potential (DP) = –55 V, and focusing potential (FP) = –150 V. MS/MS analysis used nitrogen as the collision gas. Data analysis was performed using analyst QS software (Applied Biosystem).

**LC–Multiple Reaction Monitoring.** For LC–multiple reaction monitoring (LC–MRM) analysis, the same LC conditions were used as above, but the effluent was analyzed with a 4000 Q-Trap hybrid triple quadrupole linear ion-trap mass spectrometer, equipped with a Turbo V ion source (Applied Biosystems). MRM was performed in the negative ion mode with MS settings as follows: curtain gas (CUR) = 20 psi, ion source gas 1 (GS1) = 20 psi, ion source gas 2 (GS2) = 30 psi, ion spray voltage (IS) = –4500 V, heater temperature (TEM) = 350°C, interface heater = ON, declustering potential (DP) = –40 V, entrance potential (EP) = –10 V, collision cell exit potential (CXP) = –5 V.

**In Vitro Assay of CL Synthase.** Strain BKT29 was created by introducing  $\Delta cIsA$ ,  $\Delta cIsB$ ,  $\Delta cIsC$ , and  $ymdB::\text{Kan}^R$  into UE54 (after removal of its  $\text{Kan}^R$  cassette), which is null for the *pgsA* gene (11) and therefore lacks the ability to make PG. The resulting BKT29 was transformed with plasmid pBAD30 as vector control or pBAD-A, -B, or -YC. These cells were grown to  $A_{600}$  of ~0.5 at 37°C and then induced for the respective *cls* gene expression with 0.05% arabinose. After induction, cells were grown for two more h until harvesting by centrifugation at 3500 × *g* at 4°C. The cells were then washed with 1 × PBS (pH 7.4). Afterward, the pellet was resuspended in 2 mL of 1 × PBS and lysed by passing through a French press at 18,000 psi. Cell-free lysates were collected by centrifugation at 22,000 × *g* for 20 min at 4°C. The membrane fraction was collected by further ultracentrifugation of the cell-free lysates at 266,000 × *g* at 4°C for 1 h. Pellets were collected and solubilized using a PTFE tissue grinder (VWR) in PBS. Protein concentration for these membranes was determined using a Pierce BCA assay (Thermo Scientific).

The reaction mixture of 100  $\mu\text{L}$  consisted of PBS, 0.1% Triton X-100, 10 mM  $\beta$ -mercaptoethanol, 5  $\mu\text{M}$  of synthetic, and 1 mg/mL cell membranes with the following synthetic phospholipid substrates at 5  $\mu\text{M}$  as indicated in the *Results* section: PG (17:0/14:1) or (12:0/13:0), PE (17:0/14:1), PA (17:0/14:1), or CDP-DAG (17:0/18:1). The final assay mixtures were incubated at 37°C for 30 min. To quench the reaction, 220  $\mu\text{L}$  of chloroform/methanol [1:1 (vol/vol)] was added to form a two-phase Bligh-Dyer solution. The resulting solution was vortexed and centrifuged at 5200 × *g* for 2 min. 20  $\mu\text{L}$  of the lower phase was directly injected for normal phase LC/MS/MS analysis as described above.

1. Miller JR (1972) *Experiments in Molecular Genetics* (Cold Spring Harbor Laboratory Press, Cold Spring Harbor, New York).
2. Guzman L-M, Belin D, Carson MJ, Beckwith J (1995) Tight regulation, modulation, and high-level expression by vectors containing the arabinose PBAD promoter. *J Bacteriol* 177:4121–4130.
3. Dower WJ, Miller JF, Ragsdale CW (1988) High efficiency transformation of *E. coli* by high voltage electroporation. *Nucleic Acids Res* 16:6127–6145.
4. Inoue H, Nojima H, Okayama H (1990) High efficiency transformation of *Escherichia coli* with plasmids. *Gene* 96:23–28.
5. Baba T, et al. (2006) Construction of *Escherichia coli* K-12 in-frame, single-gene knockout mutants: The Keio collection. *Mol Syst Biol* 2:2006–0008.
6. Datsenko KA, Wanner BL (2000) One-step inactivation of chromosomal genes in *Escherichia coli* K-12 using PCR products. *Proc Natl Acad Sci USA* 97:6640–6645.
7. Yu D, et al. (2000) An efficient recombination system for chromosome engineering in *Escherichia coli*. *Proc Natl Acad Sci USA* 97:5978–5983.
8. Shiba Y, et al. (2004) Activation of the Rcs signal transduction system is responsible for the thermosensitive growth defect of an *Escherichia coli* mutant lacking phosphatidylglycerol and cardiolipin. *J Bacteriol* 186:6526–6535.
9. Bligh EG, Dyer WJ (1959) A rapid method of total lipid extraction and purification. *Can J Biochem Physiol* 37:911–917.
10. Fine JB, Sprecher H (1982) Unidimensional thin-layer chromatography of phospholipids on boric acid-impregnated plates. *J Lipid Res* 23:660–663.
11. Kikuchi S, Shibuya I, Matsumoto K (2000) Viability of an *Escherichia coli* *pgsA* null mutant lacking detectable phosphatidylglycerol and cardiolipin. *J Bacteriol* 182: 371–376.

|      |     |                                   |                              |     |
|------|-----|-----------------------------------|------------------------------|-----|
| ClsA | 201 | EVVEALKVNL-----RVFLRRMD--LRQ      | HRKMIMIDNY                   | 233 |
| ClsB | 79  | EFVNELTAAGVVFVRYDPRPRLFGMRTNVFRRM | HRKIIVIDAR                   | 121 |
| ClsC | 96  | PRIEVRLFNPFSRLLRPL-GYITDFSRLNRRM  | HNKSFTVDGV                   | 138 |
|      |     |                                   |                              |     |
| ClsA | 400 | ---GGLLHTKSVLVDG                  | GELSLVGTVNLDMRSLWLNFEITLAIDD | 439 |
| ClsB | 286 | ---RRPLHGKVALMD                   | DHWATVGSSNLDPLSLSLNLEANVIHD  | 325 |
| ClsC | 362 | GNSGASLHAKTFESID                  | GKTVFIGSFNFDPRSTLLNTEMGFVIES | 414 |

Fig. S1. ClsC (YmdC) contains similar domains as canonical Cls. The three Cls of *E. coli* contain the two HKD motifs (boxed sequences) found in phospholipase D.

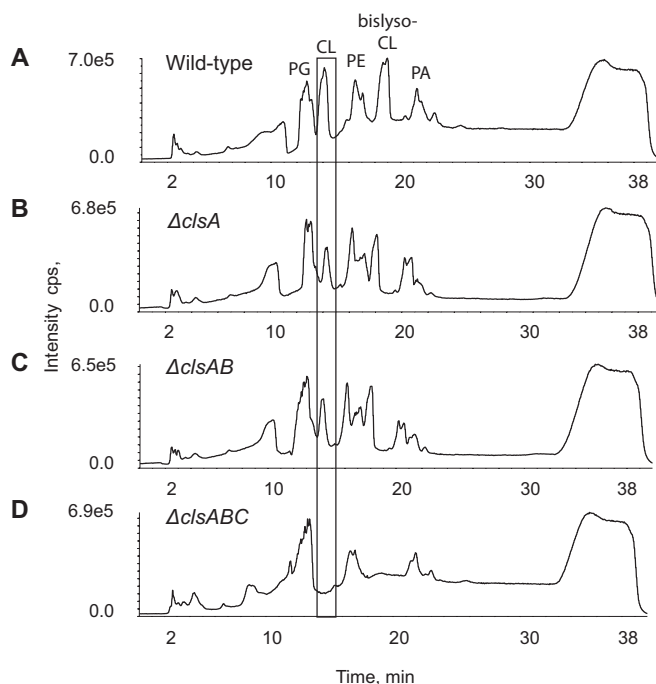

Fig. S2. Triple deletions of three Cls genes results in complete depletion of CL. Strains of *E. coli* were created lacking various *cls* genes. Cells were grown into stationary phase. Their lipid extracts were separated by LC and analyzed by MS/MS as shown in Fig. 2. Accumulation of CL was seen at ~14 min of the LC for the WT (A),  $\Delta clsA$  (B), and  $\Delta clsAB$  (C) strains. No CL was seen for the  $\Delta clsABC$  (D) strain.

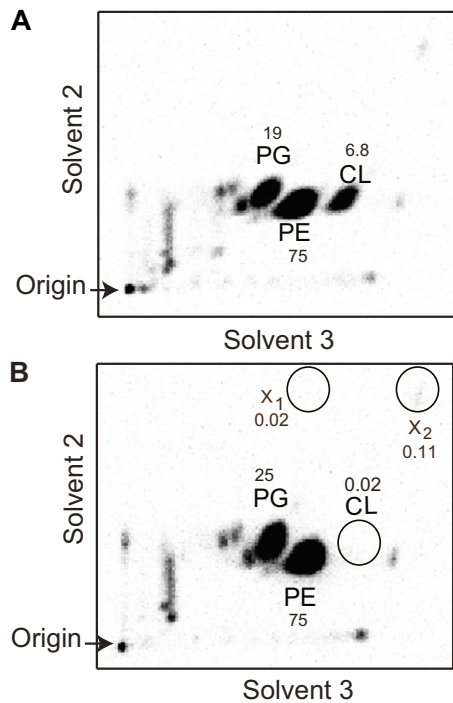

**Fig. 53.** Lack of CL formation in the  $\Delta clsABC$  mutant. WT and  $\Delta clsABC$  strains were grown to stationary phase (5 g/L NaCl) in the presence of  $[^{32}\text{P}]\text{PO}_4$ . (A) Two-dimensional TLC analysis of WT lipid fractions showed the major phospholipids (with their respective relative percent), as well as many minor phosphate-containing compounds. Quantification by imaging is described in the *SI Materials and Methods*. (B) The  $\Delta clsABC$  strain showed only the background level (empty circle labeled  $X_1$ ) at the position of CL (empty circle). The circle labeled  $X_2$  contains a phosphate-positive spot near the lower limit of detection.

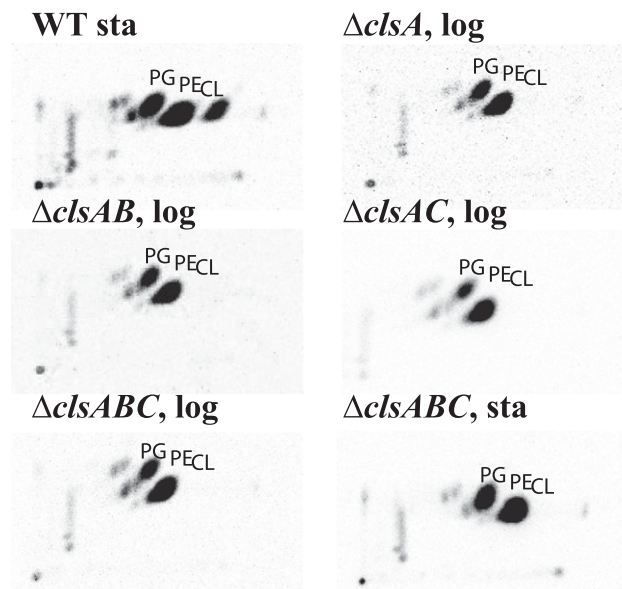

**Fig. 54.** Verification by 2D TLC of CL absence in strains displayed in Fig. 4. Selected phospholipid extracts from Fig. 3 and Table S2 were subjected to 2D TLC using solvent 2 in the vertical direction followed by solvent 3 in the horizontal direction. Growth phase of cells in LB with 5 g/L NaCl was either stationary (*sta*) or midlog (*log*). All  $\Delta clsA$  strains lack CL in log phase and  $\Delta clsABC$  lacks CL in log and stationary phase.

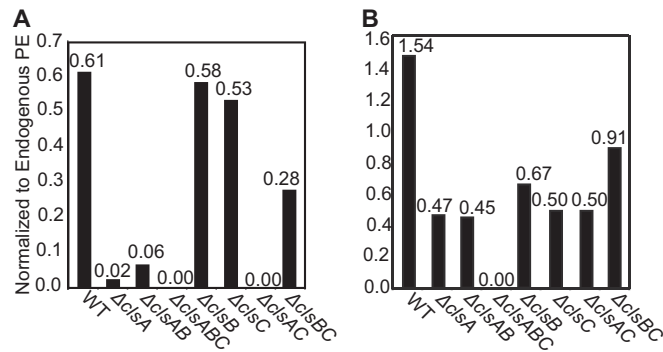

**Fig. 55.** Growth phase dependence of CL synthesis in *cIs* mutants grown in 10 g/L NaCl. Cells were grown to midlog phase (A) or stationary phase (B) in LB medium containing 10 g/L NaCl followed by determining their relative CL content by LC/MS/MS by dividing the chromatographic peak areas of the most abundant CL (*m/z* 687.5) by the chromatographic peak area of the most abundant PE. At 10 g/L of NaCl, trace amounts of CL were observed only for  $\Delta cIsA$  and  $\Delta cIsAB$  mutants at midlog phase.

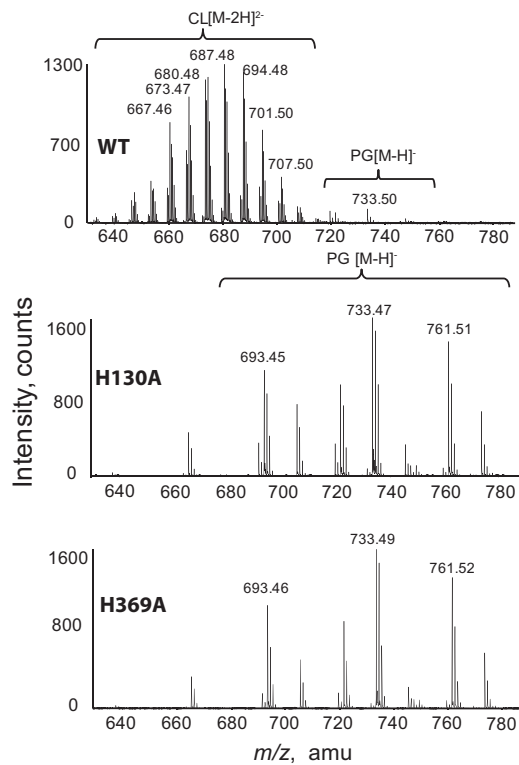

**Fig. 56.** Mutations in the HKD motifs of *ClcC* block CL synthesis. WT (Upper) or  $\Delta cIsABC$  strain expressing either pBAD-YC H130A (Middle) or pBAD-YC H369A (Lower) were grown to stationary phase in the presence of 0.2% arabinose. LC/MS analysis of lipid extracts showed no CL but elevated PG for *ClcC* in which either HKD motif was mutated (Middle and Lower).





**Table S1. Strains of *Escherichia coli* K12 and plasmids used in this work**

| Strain        | Relevant genotype                                                                                                                      | Source                                               |
|---------------|----------------------------------------------------------------------------------------------------------------------------------------|------------------------------------------------------|
| W3110         | Wild type                                                                                                                              | <i>E. coli</i> Genetic Stock Center, Yale University |
| JW1241        | BW25113 $\Delta$ <i>clsA</i> :: <i>Kan</i> <sup>R</sup>                                                                                | (1)                                                  |
| JW0772        | BW25113 $\Delta$ <i>clsB</i> :: <i>Kan</i> <sup>R</sup>                                                                                | (1)                                                  |
| JW5150        | BW25113 $\Delta$ <i>clsC</i> :: <i>Kan</i> <sup>R</sup>                                                                                | (1)                                                  |
| JW1032        | BW25113 $\Delta$ <i>ymdB</i> :: <i>Kan</i> <sup>R</sup>                                                                                | (1)                                                  |
| BKT10         | W3110 $\Delta$ <i>clsA</i> :: <i>Kan</i> <sup>R</sup>                                                                                  | This work                                            |
| BKT10a        | W3110 $\Delta$ <i>clsA</i> ; derived from BKT10                                                                                        | This work                                            |
| BKT11         | W3110 $\Delta$ <i>clsA</i> , $\Delta$ <i>clsB</i> :: <i>Kan</i> <sup>R</sup> ; derived from BKT10a                                     | This work                                            |
| BKT11a        | W3110 $\Delta$ <i>clsA</i> , $\Delta$ <i>clsB</i> ; derived from BKT11                                                                 | This work                                            |
| BKT12         | W3110 $\Delta$ <i>clsA</i> , $\Delta$ <i>clsB</i> , $\Delta$ <i>clsC</i> :: <i>Kan</i> <sup>R</sup> ; derived from BKT11a              | This work                                            |
| BKT13         | W3110 $\Delta$ <i>clsB</i> :: <i>Kan</i> <sup>R</sup>                                                                                  | This work                                            |
| BKT14         | W3110 $\Delta$ <i>clsC</i> :: <i>Kan</i> <sup>R</sup>                                                                                  | This work                                            |
| BKT14a        | W3110 $\Delta$ <i>clsC</i> ; derived from BKT14                                                                                        | This work                                            |
| BKT15         | W3110 $\Delta$ <i>clsA</i> , $\Delta$ <i>clsC</i> :: <i>Kan</i> <sup>R</sup> ; derived from BKT10a                                     | This work                                            |
| BKT16         | W3110 $\Delta$ <i>clsB</i> :: <i>Kan</i> <sup>R</sup> , $\Delta$ <i>clsC</i> ; derived from BKT14a                                     | This work                                            |
| DY330         | W3110 $\Delta$ <i>lacU</i> 169 <i>gal</i> 490 $\lambda$ <i>cl</i> 857 $\Delta$ ( <i>cro</i> - <i>bioA</i> )                            | (2)                                                  |
| BKT19         | DY330 $\Delta$ <i>clsC</i> , $\Delta$ <i>ymdB</i> :: <i>Kan</i> <sup>R</sup> ; derived from DY330                                      | This work                                            |
| BKT20         | W3110 $\Delta$ <i>clsC</i> , $\Delta$ <i>ymdB</i> :: <i>Kan</i> <sup>R</sup>                                                           | This work                                            |
| BKT21         | W3110 $\Delta$ <i>clsA</i> , $\Delta$ <i>clsB</i> , $\Delta$ <i>ymdB</i> :: <i>Kan</i> <sup>R</sup>                                    | This work                                            |
| BKT22         | W3110 $\Delta$ <i>clsA</i> , $\Delta$ <i>clsB</i> , $\Delta$ <i>clsC</i> , $\Delta$ <i>ymdB</i> :: <i>Kan</i> <sup>R</sup>             | This work                                            |
| UE54          | MG1655 <i>lpp2</i> $\Delta$ <i>ara714</i> <i>rcsF</i> :: <i>miniTn10</i> <sub>cam</sub><br>$\Delta$ <i>pgsA</i> ::FRT- <i>Kan</i> -FRT | (3)                                                  |
| BKT25         | MG1655 <i>lpp2</i> $\Delta$ <i>ara714</i> <i>rcsF</i> :: <i>miniTn10</i> <sub>cam</sub> $\Delta$ <i>pgsA</i>                           | This work                                            |
| BKT29         | BKT25 $\Delta$ <i>clsA</i> , $\Delta$ <i>clsB</i> , $\Delta$ <i>clsC</i> , $\Delta$ <i>ymdB</i> :: <i>Kan</i> <sup>R</sup>             | This work                                            |
| Plasmid       |                                                                                                                                        |                                                      |
| pCP20         | FLP recombinase expression; Amp <sup>R</sup> Cam <sup>R</sup> ;<br>temperature-sensitive replicon                                      | (4)                                                  |
| pBAD30        | Low copy number expression plasmid                                                                                                     | (5)                                                  |
| pBAD-A        | <i>clsA</i> inserted between XbaI and SphI of pBAD30                                                                                   | This work                                            |
| pBAD-B        | <i>clsB</i> inserted between XbaI and HindIII of pBAD30                                                                                | This work                                            |
| pBAD-C        | <i>clsC</i> inserted between XbaI and HindIII of pBAD30                                                                                | This work                                            |
| pBAD-YC       | <i>ymdB</i> - <i>clsC</i> inserted between XbaI and HindIII of pBAD30                                                                  | This work                                            |
| pWSK29        | Low copy number expression plasmid                                                                                                     | (6)                                                  |
| pWSK29-Y      | <i>ymdB</i> inserted between XbaI and HindIII of pWSK29                                                                                | This work                                            |
| pBAD-YC H130A | <i>clsC</i> with H130A substitution, <i>ymdB</i> wild type                                                                             | This work                                            |
| pBAD-YC H369A | <i>clsC</i> with H369A substitution, <i>ymdB</i> wild type                                                                             | This work                                            |

- Baba T, et al. (2006) Construction of *Escherichia coli* K-12 in-frame, single-gene knockout mutants: the Keio collection. *Mol Syst Biol* 2:2006–0008.
- Yu D, et al. (2000) An efficient recombination system for chromosome engineering in *Escherichia coli*. *Proc Natl Acad Sci USA* 97:5978–5983.
- Shiba Y, et al. (2004) Activation of the Rcs signal transduction system is responsible for the thermosensitive growth defect of an *Escherichia coli* mutant lacking phosphatidylglycerol and cardiolipin. *J Bacteriol* 186:6526–6535.
- Datsenko KA, Wanner BL (2000) One-step inactivation of chromosomal genes in *Escherichia coli* K-12 using PCR products. *Proc Natl Acad Sci USA* 97:6640–6645.
- Guzman L-M, Belin D, Carson MJ, Beckwith J (1995) Tight regulation, modulation, and high-level expression by vectors containing the arabinose PBAD promoter. *J Bacteriol* 177:4121–4130.
- Wang RF, Kushner SR (1991) Construction of versatile low-copy-number vectors for cloning, sequencing and gene expression in *Escherichia coli*. *Gene* 100:195–199.
